# Supplementary material
Source: Elsevier journal article supplement (https://www.sciencedirect.com/science/article/pii/S1134009621000164)
Supplement: mmc1 [file S1134009621000164:mmc1.pdf]

## DICTAMEN ÚNICO EN LA COMUNIDAD AUTÓNOMA DE ANDALUCÍA

D/Dª: Carlos García Pérez como secretario/a del CEI de los hospitales universitarios Virgen Macarena-Virgen del Rocío

### CERTIFICA

Que este Comité ha evaluado la propuesta del promotor/investigador (No hay promotor/a asociado/a) para realizar el estudio de investigación titulado:

TÍTULO DEL ESTUDIO: ESTUDIO PARA LA VALORACIÓN DEL IMPACTO DE LA PANDEMIA DE COVID-19 SOBRE LA ACTIVIDAD QUIRÚRGICA DE LOS SERVICIOS DE CIRUGÍA CARDIOVASCULAR EN ESPAÑA. ,( IMPACTO DEL COVID EN LA CIRUGÍA CARDIOVASCULAR)

Protocolo, Versión: 1.1

HIP, Versión:

CI, Versión:

Y que considera que:

Se cumplen los requisitos necesarios de idoneidad del protocolo en relación con los objetivos del estudio y se ajusta a los principios éticos aplicables a este tipo de estudios.

La capacidad del/de la investigador/a y los medios disponibles son apropiados para llevar a cabo el estudio.

Están justificados los riesgos y molestias previsibles para los participantes.

Que los aspectos económicos involucrados en el proyecto, no interfieren con respecto a los postulados éticos.

Y que este Comité considera, que dicho estudio puede ser realizado en los Centros de la Comunidad Autónoma de Andalucía que se relacionan, para lo cual corresponde a la Dirección del Centro correspondiente determinar si la capacidad y los medios disponibles son apropiados para llevar a cabo el estudio.

Lo que firmo en Sevilla a 09/12/2020

D/Dª: Carlos García Pérez, como Secretario/a del CEI de los hospitales universitarios Virgen Macarena-Virgen del Rocío

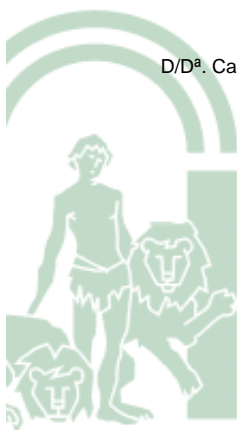

|                                |                                                                                                                                             |       |            |  |
|--------------------------------|---------------------------------------------------------------------------------------------------------------------------------------------|-------|------------|--|
| Código Seguro De Verificación: | bce016836c93d7c4c6184766a9eb020060b2d95c                                                                                                    | Fecha | 09/12/2020 |  |
| Normativa                      | Este documento incorpora firma electrónica reconocida de acuerdo a la Ley 59/2003, de 19 de diciembre, de firma electrónica.                |       |            |  |
| Firmado Por                    | Carlos García Pérez                                                                                                                         |       |            |  |
| Url De Verificación            | https://www.juntadeandalucia.es/salud/portaldeetica/xhtml/ayuda/verificarFirmaDocumento.iface/code/bce016836c93d7c4c6184766a9eb020060b2d95c |       | Página     |  |

## CERTIFICA

Que este Comité ha ponderado y evaluado en sesión celebrada el 24/11/2020 y recogida en acta 20/2020 la propuesta del/de la Promotor/a (No hay promotor/a asociado/a), para realizar el estudio de investigación titulado:

TÍTULO DEL ESTUDIO: ESTUDIO PARA LA VALORACIÓN DEL IMPACTO DE LA PANDEMIA DE COVID-19 SOBRE LA ACTIVIDAD QUIRÚRGICA DE LOS SERVICIOS DE CIRUGÍA CARDIOVASCULAR EN ESPAÑA. ,( IMPACTO DEL COVID EN LA CIRUGÍA CARDIOVASCULAR)

Protocolo, Versión: 1.1

HIP, Versión:

CI, Versión:

Que a dicha sesión asistieron los siguientes integrantes del Comité:

### Presidente/a

D/Dª. Víctor Sánchez Margalet

### Vicepresidente/a

D/Dª. Dolores Jiménez Hernández

### Secretario/a

D/Dª. Carlos García Pérez

### Vocales

D/Dª. Enrique Calderón Sandubete  
D/Dª. Gabriel Ramírez Soto  
D/Dª. Ana Melcón de Dios-  
D/Dª. Cristina Pichardo Guerrero  
D/Dª. Javier Vitorica Fernandez  
D/Dª. MARIA EUGENIA ACOSTA MOSQUERA  
D/Dª. Enrique de Álava Casado  
D/Dª. EVA MARIA DELGADO CUESTA  
D/Dª. ANGELA CEJUDO LOPEZ  
D/Dª. Amancio Carnero Moya  
D/Dª. Regina Sandra Benavente Cantalejo  
D/Dª. M José Carbonero Celis  
D/Dª. LUIS GABRIEL LUQUE ROMERO  
D/Dª. ANTONIO PÉREZ PÉREZ  
D/Dª. María Pilar Guadix Martín  
D/Dª. ESPERANZA GALLEGU CALVENTE

Que dicho Comité, está constituido y actúa de acuerdo con la normativa vigente y las directrices de la Conferencia Internacional de Buena Práctica Clínica.

Lo que firmo en Sevilla a 09/12/2020

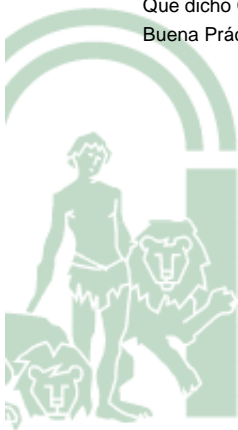

|                                |                                                                                                                                             |       |            |  |
|--------------------------------|---------------------------------------------------------------------------------------------------------------------------------------------|-------|------------|--|
| Código Seguro De Verificación: | bce016836c93d7c4c6184766a9eb020060b2d95c                                                                                                    | Fecha | 09/12/2020 |  |
| Normativa                      | Este documento incorpora firma electrónica reconocida de acuerdo a la Ley 59/2003, de 19 de diciembre, de firma electrónica.                |       |            |  |
| Firmado Por                    | Carlos García Pérez                                                                                                                         |       |            |  |
| Url De Verificación            | https://www.juntadeandalucia.es/salud/portaldeetica/xhtml/ayuda/verificarFirmaDocumento.iface/code/bce016836c93d7c4c6184766a9eb020060b2d95c |       | Página     |  |
